# Supplementary material for: Narrow-leafed lupin (Lupinus angustifoliusL.) seed β-conglutins reverse the induced insulin resistance in pancreatic cells
Source: Royal Society of Chemistry journal article supplement (doi:10.1039/c8fo01164h), 2018-01-01
Supplement: c8fo01164h2.pdf [file c8fo01164h2.pdf]

## SUPPLEMENTARY MATERIAL

### **Supplementary Figure S1. Purification of conglutin proteins $\beta 1$ , $\beta 2$ , $\beta 3$ , $\beta 4$ , and $\beta 6$ . (A)**

Five purified  $\beta$ -conglutin proteins were stained with Coomassie, with a high level of purity (> 95%). (B) Immunoblotting shows the same five purified  $\beta$ -conglutin proteins identified by the anti-  $\beta$ -conglutin antibody. **MW**, molecular weight standard (kDa).

**Supplementary Figure S2. Insulin resistance cell model. (A)** Increasing concentrations of insulin from  $3 \times 10^{-5}$  to  $3 \times 10^{-9}$  nmol/L showed that C cell culture did uptake the lower level of glucose at  $3 \times 10^{-7}$  nmol/L, taking this concentration as the level of insulin where cells acquired the resistance state. (B) C cells were cultured for one, two and three days, testing the glucose uptake of cultures including  $3 \times 10^{-7}$  nmol/L (white bars), in comparison to control C cells (black bars). In these assays were showed that insulin resistance state is preserved for 48 hours.

$p^* < 0.05$  IR-C vs C.

**Supplementary Table S1. Cell viability (%) and dose effects of each purified NLL  $\beta$ -conglutin proteins ( $\beta$ 1,  $\beta$ 3  $\beta$ 6,  $\beta$ 2, and  $\beta$ 4) on insulin resistance cell model.**

Cytotoxicity of  $\beta$ 1,  $\beta$ 3,  $\beta$ 6,  $\beta$ 2, and  $\beta$ 4 assayed on IR—C pancreatic cells. Cells were treated with 5 $\mu$ g and 10 $\mu$ g of individual  $\beta$ -conglutin isoforms or a mix including all  $\beta$ -conglutins for 24h. Data represent cell viability (%) corresponding to three independent experiments (mean  $\pm$  SEM). Control sample was assayed only with insulin.

| Samples                | 5 $\mu$ g       | 10 $\mu$ g     |
|------------------------|-----------------|----------------|
| Control                | 100             | 100            |
| $\beta$ 1              | 114.0 $\pm$ 8.6 | 82.0 $\pm$ 3.6 |
| $\beta$ 2              | 114.0 $\pm$ 3.8 | 88.0 $\pm$ 1.8 |
| $\beta$ 3              | 106.0 $\pm$ 5.8 | 96.9 $\pm$ 3.1 |
| $\beta$ 4              | 102.0 $\pm$ 2.9 | 89.7 $\pm$ 0.5 |
| $\beta$ 6              | 101.0 $\pm$ 1.9 | 88.9 $\pm$ 3.2 |
| $\beta$ -conglutin mix | 99.0 $\pm$ 4.7  | 90.0 $\pm$ 1.5 |

**Supplementary Table S2. Characteristics of the study groups.** Values represent the median (25th percentile, 75th percentile). To detect differences between groups, we used analysis of variance; statistical significant P-values ( $p < 0.01$ ); bmi, body mass index; HbA1c, glycosylated hemoglobin 1c; BPM, beats per minute; T2D, type 2 diabetes.

| <b>Patient characteristics</b> | <b>Control group</b> | <b>T2D</b>        | <b><i>P</i>-value</b> |
|--------------------------------|----------------------|-------------------|-----------------------|
| Male                           | 14                   | 14                | —                     |
| Age                            | 50 (40, 53)          | 48 (45, 58)       | 0.007                 |
| Fasting glycaemia (mg/dL)      | 83 (80, 91)          | 165 (132, 198)    | <0.001                |
| Blood pressure (mmHg)          | 12/7 (11/7, 12/7)    | 15/8 (14/8, 15/7) | <0.001                |
| BMI (kg/m <sup>2</sup> )       | 24.8 (23.0, 26.6)    | 33.3 (27.5, 46.7) | <0.001                |
| Heart rate (bpm)               | 64 (65, 76)          | 84 (96, 80)       | <0.001                |
| HbA1c (%)                      | 5.5 (5.4, 5.7)       | 6.7 (6.0, 7.4)    | <0.001                |

**Supplementary Table S3. Effect of NLL conglutin proteins  $\beta 1$ ,  $\beta 3$ ,  $\beta 6$ ,  $\beta 2$ , and  $\beta 4$  on inflammation diabetes-related genes in isolated PBMC from type 2 diabetic patients' blood.**

Numbers represent fold-change obtained from qPCR array data analysis of inflammation diabetes-related genes. Treatments with  $\beta 1$ ,  $\beta 3$ ,  $\beta 6$ ,  $\beta 2$ , and  $\beta 4$ , resulted in a significant up- or down-regulation of these genes compared to control patients. Data represent three independent experiments. Values presenting statistical significant ( $P < 0.05$ ) differences with T2DM are depicted in bold.

| Gene name                                                       | Gene acronym                     | Up-/Down-regulation*                         | T2D    | $\beta 1$    | $\beta 3$    | $\beta 6$    | $\beta 2$    | $\beta 4$    |
|-----------------------------------------------------------------|----------------------------------|----------------------------------------------|--------|--------------|--------------|--------------|--------------|--------------|
| <b>Metabolic enzymes</b>                                        |                                  |                                              |        |              |              |              |              |              |
| Glucagon-like peptide 1 receptor                                | GLP-1R                           | $\beta 2$ , $\beta 4 \uparrow$               | 1.00   | 1            | 1.68         | 1.20         | <b>23.68</b> | <b>22.93</b> |
| Glycogen synthase kinase 3 beta                                 | GSK3B                            | $\beta 1$ , $\beta 3$ , $\beta 6 \downarrow$ | 24.76  | <b>3.88</b>  | <b>2.93</b>  | <b>2.44</b>  | 22.96        | 25.95        |
| Protein kinase, AMP-activated, $\alpha 1$ catalytic subunit     | AMPK $\alpha 1$ /PRKA $\alpha 1$ | $\beta 2 \uparrow$                           | 27.97  | 26.95        | 24.99        | 22.70        | <b>36.07</b> | 22.05        |
| Protein kinase, AMP-activated, $\gamma 2$ non-catalytic subunit | AMPK $\gamma 2$ /PRK $\gamma 2$  | $\beta 1 \uparrow$                           | 25.876 | <b>34.70</b> | 26.75        | 24.90        | 29.55        | 25.81        |
| Protein tyrosine phosphatase, non-receptor type 1               | PTPN1                            | $\beta 1$ , $\beta 3$ , $\beta 6 \downarrow$ | 30.09  | <b>3.72</b>  | <b>6.13</b>  | <b>2.97</b>  | 34.18        | 24.99        |
| <b>Cytokines and growth factors</b>                             |                                  |                                              |        |              |              |              |              |              |
| Interferon, gamma                                               | IFN $\gamma$                     | $\beta 1$ , $\beta 3$ , $\beta 6 \downarrow$ | 2.36   | <b>-3.73</b> | <b>-2.55</b> | <b>-3.44</b> | 3.77         | 6.97         |
| Tumor necrosis factor                                           | TNF $\alpha$                     | $\beta 1$ , $\beta 3$ , $\beta 6 \downarrow$ | 34.39  | <b>5.94</b>  | <b>2.4</b>   | <b>2.71</b>  | 32.81        | 22.97        |
| Insulin                                                         | INS                              | $\beta 1$ , $\beta 3$ , $\beta 6 \uparrow$   | -6.98  | <b>17.03</b> | <b>26.96</b> | <b>26.96</b> | -2.47        | -1.73        |
| <b>Cell Signalling</b>                                          |                                  |                                              |        |              |              |              |              |              |
| V-akt murine thymoma viral oncogene homolog 2                   | AKT2/PKB $\beta$                 | $\beta 1$ , $\beta 3$ , $\beta 6 \uparrow$   | 1.40   | <b>20.93</b> | <b>25.97</b> | <b>21.49</b> | 2.70         | 2.00         |
| RAB4A, member RAS oncogene family                               | RAB4A                            | $\beta 1$ , $\beta 3$ , $\beta 6 \downarrow$ | 31.09  | <b>8.96</b>  | <b>3.91</b>  | <b>2.96</b>  | 36.94        | 23.50        |

\* indicate particular  $\beta$ -conglutin isoforms that up- or down-regulated the mRNA expression level of each gene in comparison with the control (T2D).
